# Supplementary material for: Nebulization assisted molecular LIBS for sensitive and fast fluorine determination in aqueous solutions
Source: Royal Society of Chemistry journal article supplement (doi:10.1039/d2ja00319h), 2022-11-11
Supplement: d2ja00319h1.pdf [file d2ja00319h1.pdf]

## Supporting information for “Nebulization assisted molecular LIBS for sensitive and fast fluorine determination in aqueous solutions”

Spectra corresponding to nebulization protocol optimization (Figure 5, Section 3.2).

The following Figure S1 shows the four spectra, each corresponding to a raster, obtained for each of the six procedures studied in Section 3.2. Firstly, each spectrum was normalized as explained in the main text (to 517.2 nm, indicated with a vertical black line in the Figure) and afterwards the average was calculated, excluding the spectra corresponding to data points identified as outliers by  $2\sigma$  criterium applied to the integrated areas of CaF emission; for this optimization study, no more than one repetition was sorted out by this criterium.

The Figure allows to observe directly the predominance of CaF intensity for the first raster in all cases considered, and the stable signal obtained for the following three rasters. It is also observed that atomic Ca I signals are moderately decreased with respect to CaF for N2 configurations as compared to N1.

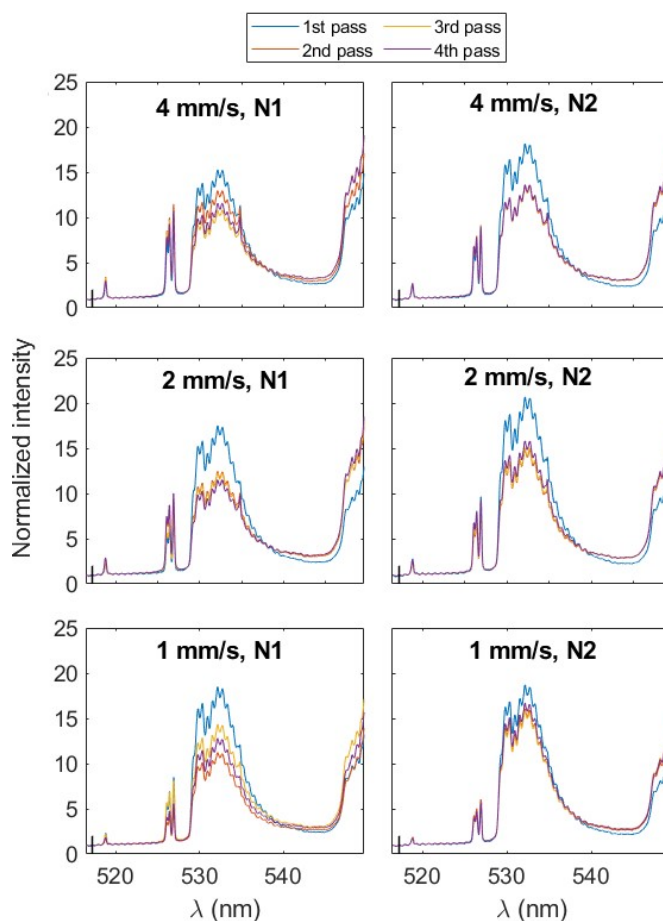

Figure S1. Average normalized spectra corresponding to the four rasters in each of the six working configurations. Vertical black line indicates normalization region.
